# Supplementary material for: miR-708-5p: a microRNA with emerging roles in cancer
Source: PubMed Central journal article supplement (PMC5642637; doi:10.18632/oncotarget.19772), 2017-08-01
Supplement: oncotarget-08-71292-s001.pdf [file oncotarget-08-71292-s001.pdf]

## miR-708-5p: a microRNA with emerging roles in cancer

## SUPPLEMENTARY MATERIALS

Supplementary Table 1: List of Abbreviations

| Abbreviation   | Full Name                                                                      | Abbreviation2    | Full Name                                                         |
|----------------|--------------------------------------------------------------------------------|------------------|-------------------------------------------------------------------|
| <b>OCT4</b>    | octamer-binding transcription factor 4                                         | <b>LSD1</b>      | lysine-specific histone demethylase 1                             |
| <b>Ago1-4</b>  | Argonaute 1-4                                                                  | <b>MAPK</b>      | mitogen-activated protein kinase                                  |
| <b>AKT1/2</b>  | RAC-alpha serine/threonine-protein kinase 1/2                                  | <b>MCAM</b>      | melanoma cell adhesion molecule                                   |
| <b>ALDH1A2</b> | Aldehyde Dehydrogenase 1 Family Member A2                                      | <b>MCL</b>       | Mantle-cell lymphoma                                              |
| <b>ALL</b>     | Acute Lymphoblastic Leukemia                                                   | <b>miRNAs</b>    | microRNAs                                                         |
| <b>APC</b>     | Adenomatous polyposis coli                                                     | <b>MLL</b>       | Mixed-Lineage Leukemia                                            |
| <b>BCL-2</b>   | B-cell lymphoma 2                                                              | <b>MMP-2</b>     | matrix metalloproteinase 2                                        |
| <b>BCL2A1</b>  | Bcl-2-related protein A1                                                       | <b>Mtss1</b>     | metastasis suppressor protein 1                                   |
| <b>BIM</b>     | Bcl-2-like protein 11                                                          | <b>NF-kB</b>     | nuclear factor kappa-light-chain-enhancer of activated B cells    |
| <b>BMI1</b>    | polycomb complex protein BMI-1                                                 | <b>NFKBIA</b>    | NF-kB inhibitor alpha                                             |
| <b>C/EBPβ</b>  | CCAAT-enhancer-binding protein β                                               | <b>NNAT</b>      | neuronatin                                                        |
| <b>C/EBPβ</b>  | CCAAT/enhancer-binding protein β                                               | <b>NSCLC</b>     | Non-small cell lung cancer                                        |
| <b>CADM1</b>   | Cell adhesion molecule 1                                                       | <b>OCT4</b>      | octamer-binding transcription factor 4                            |
| <b>CCL2</b>    | chemokine (C-C motif) ligand 2                                                 | <b>OS</b>        | overall survival                                                  |
| <b>CCL8</b>    | chemokine (C-C motif) ligand 8                                                 | <b>p21</b>       | cyclin-dependent kinase inhibitor 1                               |
| <b>CD#</b>     | Cluster of differentiation #                                                   | <b>PARP-1</b>    | Poly[ADP ribose] polymerase 1                                     |
| <b>CDK4/6</b>  | cyclin-dependent kinase 4/6                                                    | <b>PAX</b>       | Paxillin                                                          |
| <b>CDKN2B</b>  | cyclin-dependent kinase inhibitor 2B                                           | <b>PBMC</b>      | Peripheral blood mononuclear cell                                 |
| <b>cFLIP</b>   | cellular FLICE-like inhibitory protein                                         | <b>PHLDA3</b>    | Pleckstrin Homology Like Domain Family A Member 3                 |
| <b>CHOP</b>    | CCAAT enhancer-binding protein homologous protein                              | <b>PI3K</b>      | Phosphatidylinositol-4,5-bisphosphate 3-kinase                    |
| <b>CLL</b>     | Chronic Lymphoblastic Leukemia                                                 | <b>PIK3IP1</b>   | Phosphoinositide-3-kinase-interacting protein 1                   |
| <b>CRC</b>     | Colorectal cancer                                                              | <b>PMA</b>       | phorbol 12-myristate 13-acetate                                   |
| <b>CTBP2</b>   | C-terminal-binding protein 2                                                   | <b>pPNL</b>      | persistant preneoplastic liver lesion                             |
| <b>CTCF</b>    | 11-zinc finger protein                                                         | <b>PRC2</b>      | polycomb repressive complex 2                                     |
| <b>CXCL#</b>   | chemokine (C-X-C motif) ligand #                                               | <b>pri-miRNA</b> | primary miRNA                                                     |
| <b>E2F1</b>    | E2F transcription factor 1                                                     | <b>pSTAT3</b>    | phosphorylated signal transducer and activator of transcription 3 |
| <b>EMT</b>     | epithelial-mesenchymal transition                                              | <b>RAD21</b>     | RAD21 cohesion complex component                                  |
| <b>ER</b>      | endoplasmic reticulum                                                          | <b>Rap1b</b>     | Ras-related protein Rap1b                                         |
| <b>ERK</b>     | extracellular signal-regulated kinase                                          | <b>RCC</b>       | Renal cell carcinoma                                              |
| <b>EWSR1</b>   | Ewing sarcoma breakpoint region 1                                              | <b>RFS</b>       | relapse-free survival                                             |
| <b>EYA3</b>    | eyes absent homolog 3                                                          | <b>RISC</b>      | RNA-induced silencing complex                                     |
| <b>EZH2</b>    | enhancer of zeste homolog 2                                                    | <b>RNA-BP</b>    | RNA-binding protein                                               |
| <b>FAK</b>     | focal adhesion kinase                                                          | <b>SCC</b>       | Squamous cell carcinoma                                           |
| <b>FasL</b>    | Fas ligand                                                                     | <b>Survivin</b>  | baculoviral inhibitor of apoptosis repeat-containing 5            |
| <b>FLI1</b>    | Friend leukemia integration transcription factor 1                             | <b>SUZ12</b>     | SUZ12 polycomb repressive complex 2 subunit                       |
| <b>FOXO3</b>   | Forkhead box O3                                                                | <b>TAM</b>       | tumor-associated macrophage                                       |
| <b>GBM</b>     | Glioblastoma Multiforme                                                        | <b>Tenm4</b>     | Teneurin Transmembrane Protein 4                                  |
| <b>GC</b>      | glucocorticoid                                                                 | <b>TGF-β</b>     | Transforming growth factor beta                                   |
| <b>GO</b>      | gene ontology                                                                  | <b>Timp3</b>     | metalloproteinase inhibitor 3                                     |
| <b>GRE</b>     | glucocorticoid-response element                                                | <b>TME</b>       | tumor microenvironment                                            |
| <b>GRα</b>     | glucocorticoid receptor α                                                      | <b>TNFα</b>      | Tumor necrosis factor α                                           |
| <b>HCC</b>     | Hepatocellular carcinoma                                                       | <b>TNM</b>       | tumor node metastasis                                             |
| <b>IAP</b>     | inhibitor of apoptosis                                                         | <b>TRAIL</b>     | TNF-related apoptosis-inducing ligand                             |
| <b>IKKβ</b>    | inhibitor of nuclear factor kappa-B kinase subunit beta                        | <b>UPR</b>       | unfolded protein response                                         |
| <b>IL-#</b>    | Interleukin #                                                                  | <b>UTR</b>       | Untranslated region                                               |
| <b>INPPL1</b>  | SH2-domain containing Phosphatidylinositol-3,4,5-trisphosphate 5-phosphatase 2 | <b>VEGFC</b>     | Vascular endothelial growth factor C                              |
| <b>KPNA4</b>   | karyopherin importin subunit alpha-4                                           | <b>ZEB2</b>      | zince finger E-box-binding homeobox 2                             |
| <b>LIC</b>     | leukemia-initiating cell                                                       |                  |                                                                   |
